# Supplementary material
Source: ML conference proceedings conference paper supplement (https://proceedings.neurips.cc/paper_files/paper/2018/hash/1700002963a49da13542e0726b7bb758-Abstract.html)
Supplement: Supplementary file [file 1700002963a49da13542e0726b7bb758-Supplemental.zip]

---

## Supplementary Material: Soft-Gated Warping-GAN for Pose-Guided Person Image Synthesis

---

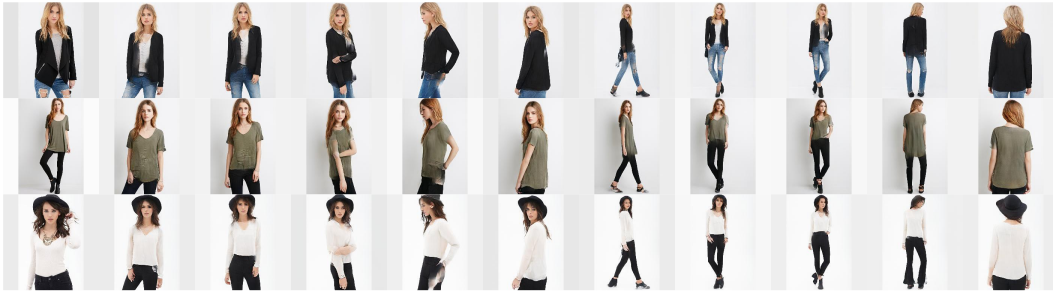

Figure 1: Some results of different target poses with the same condition image (first column) on DeepFashion [5].

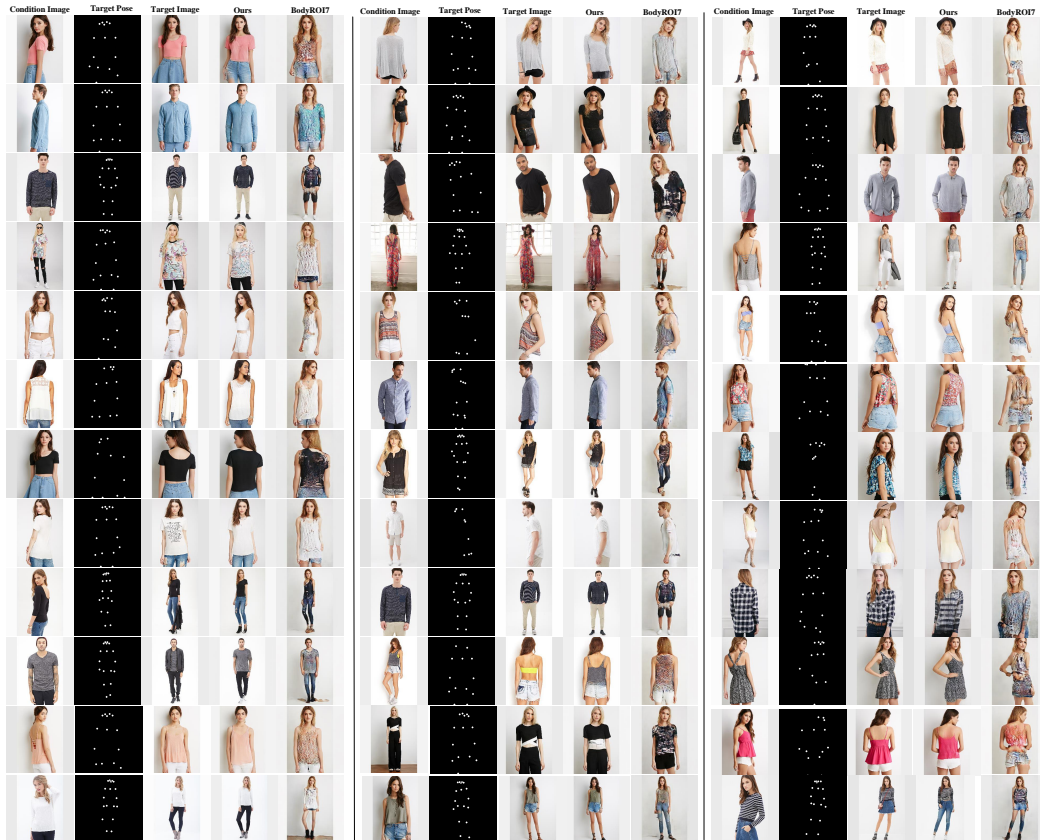

Figure 2: Compare against with BodyROI7 [2] (CVPR2018) on DeepFashion [5].

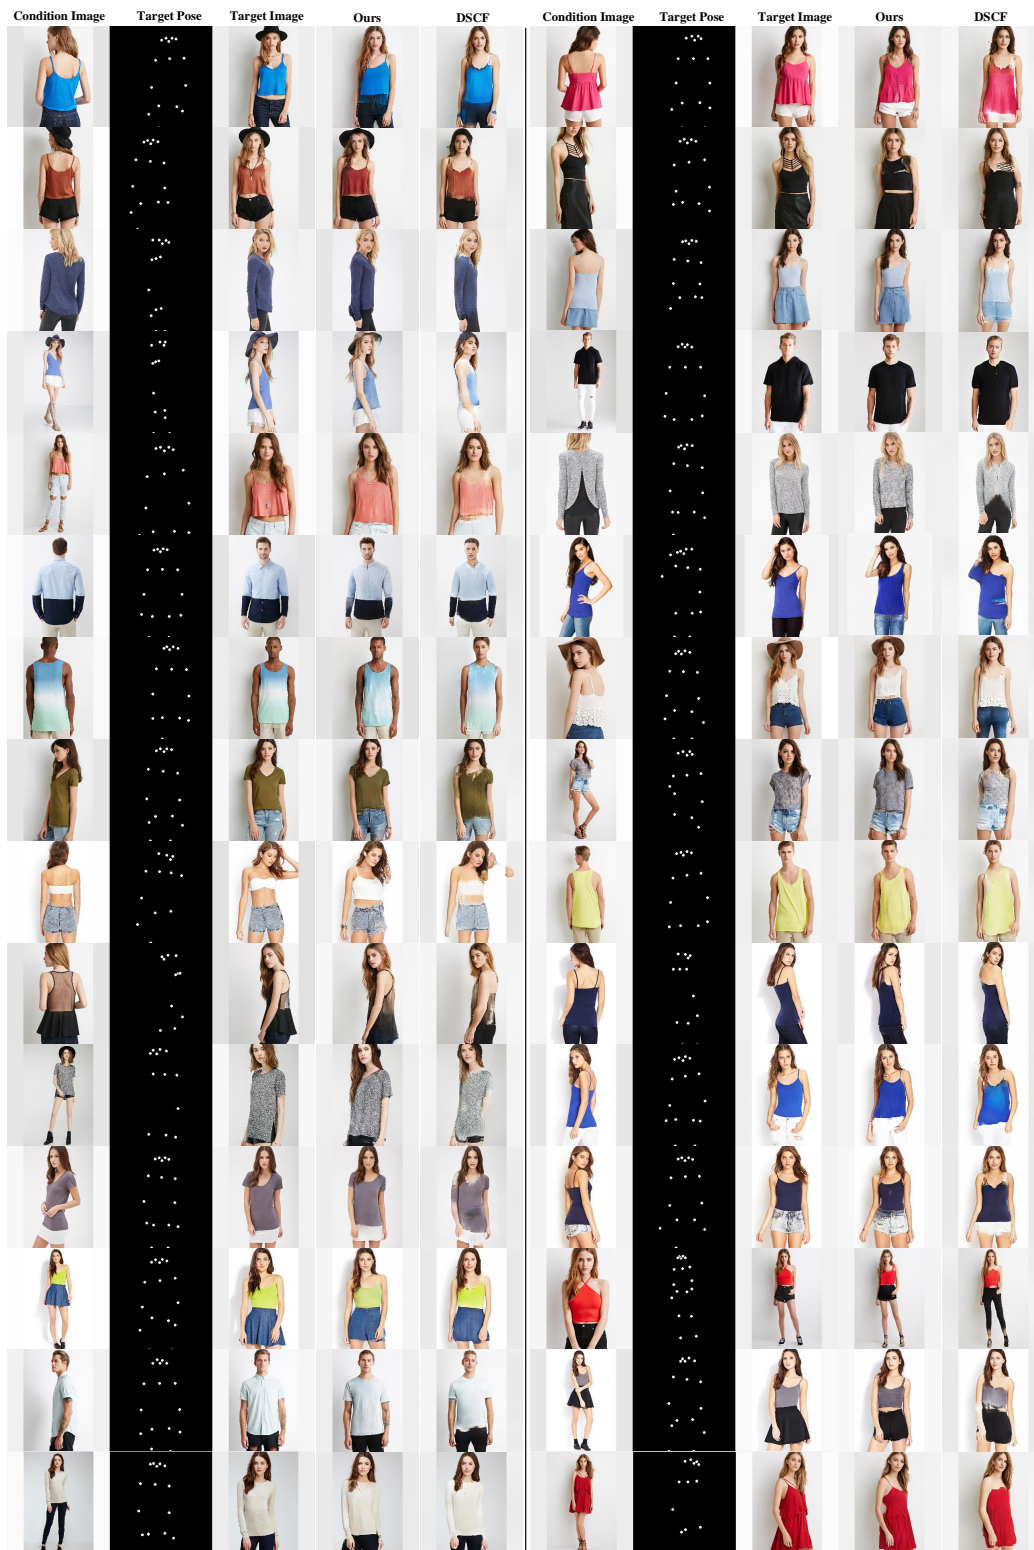

Figure 3: Compare against with DSCF [3] (CVPR2018) on DeepFashion [5]. Zoom in for details.

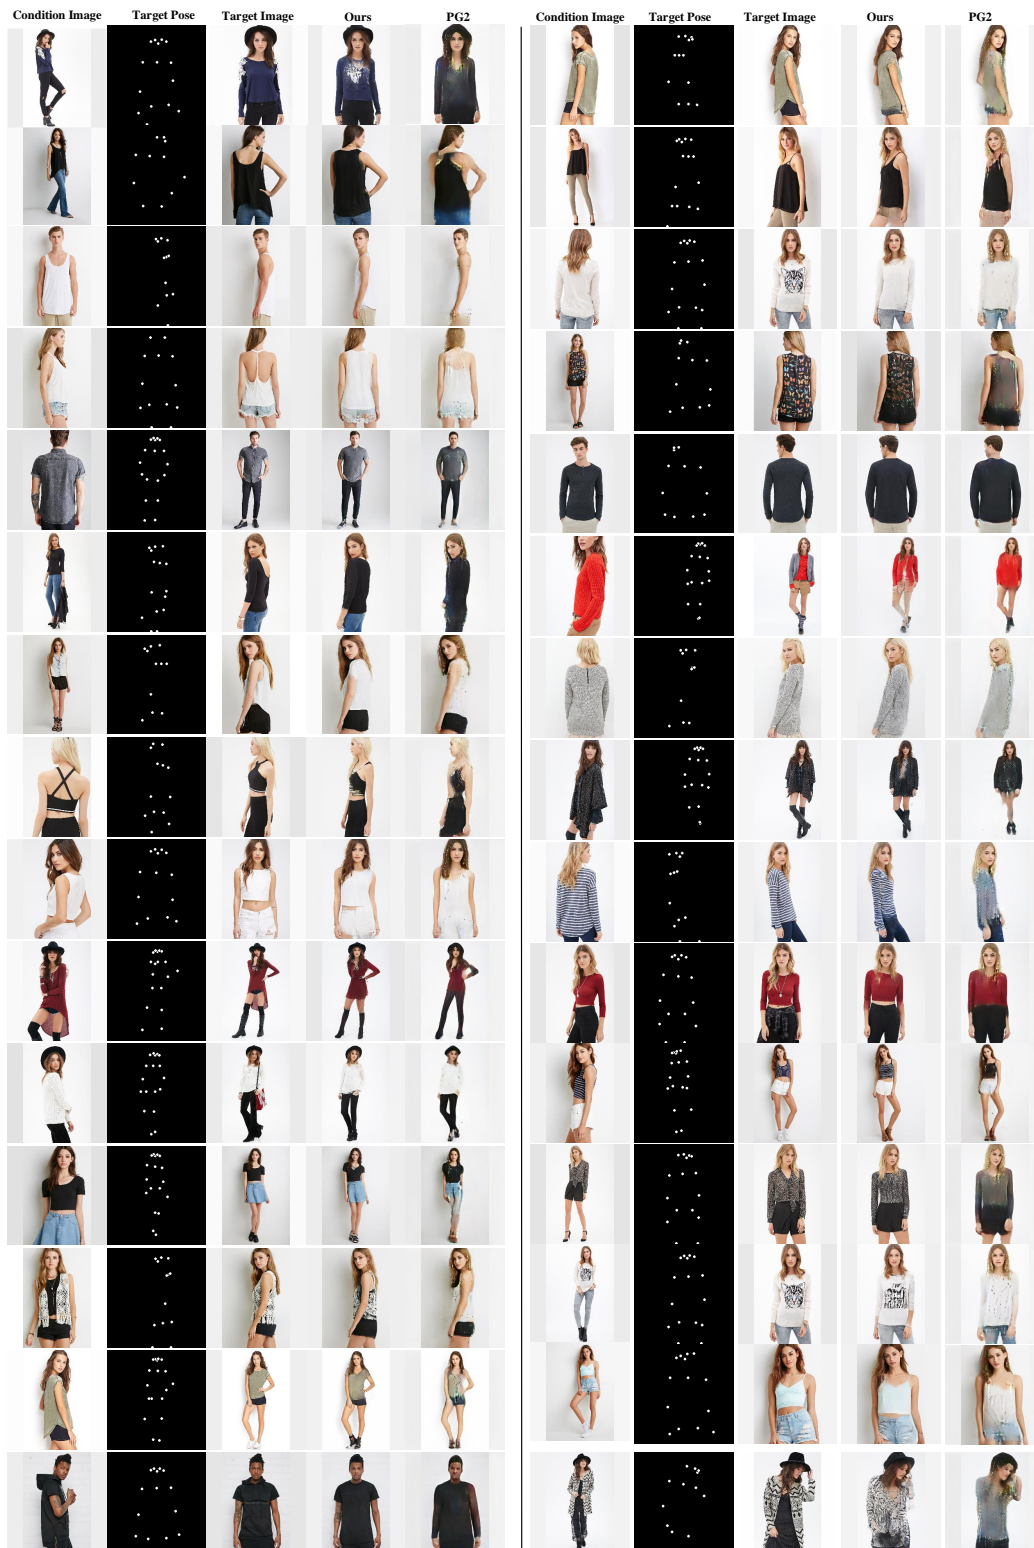

Figure 4: Compare against with PG2 [1] (NIPS2017) on DeepFashion [5]. Zoom in for details.



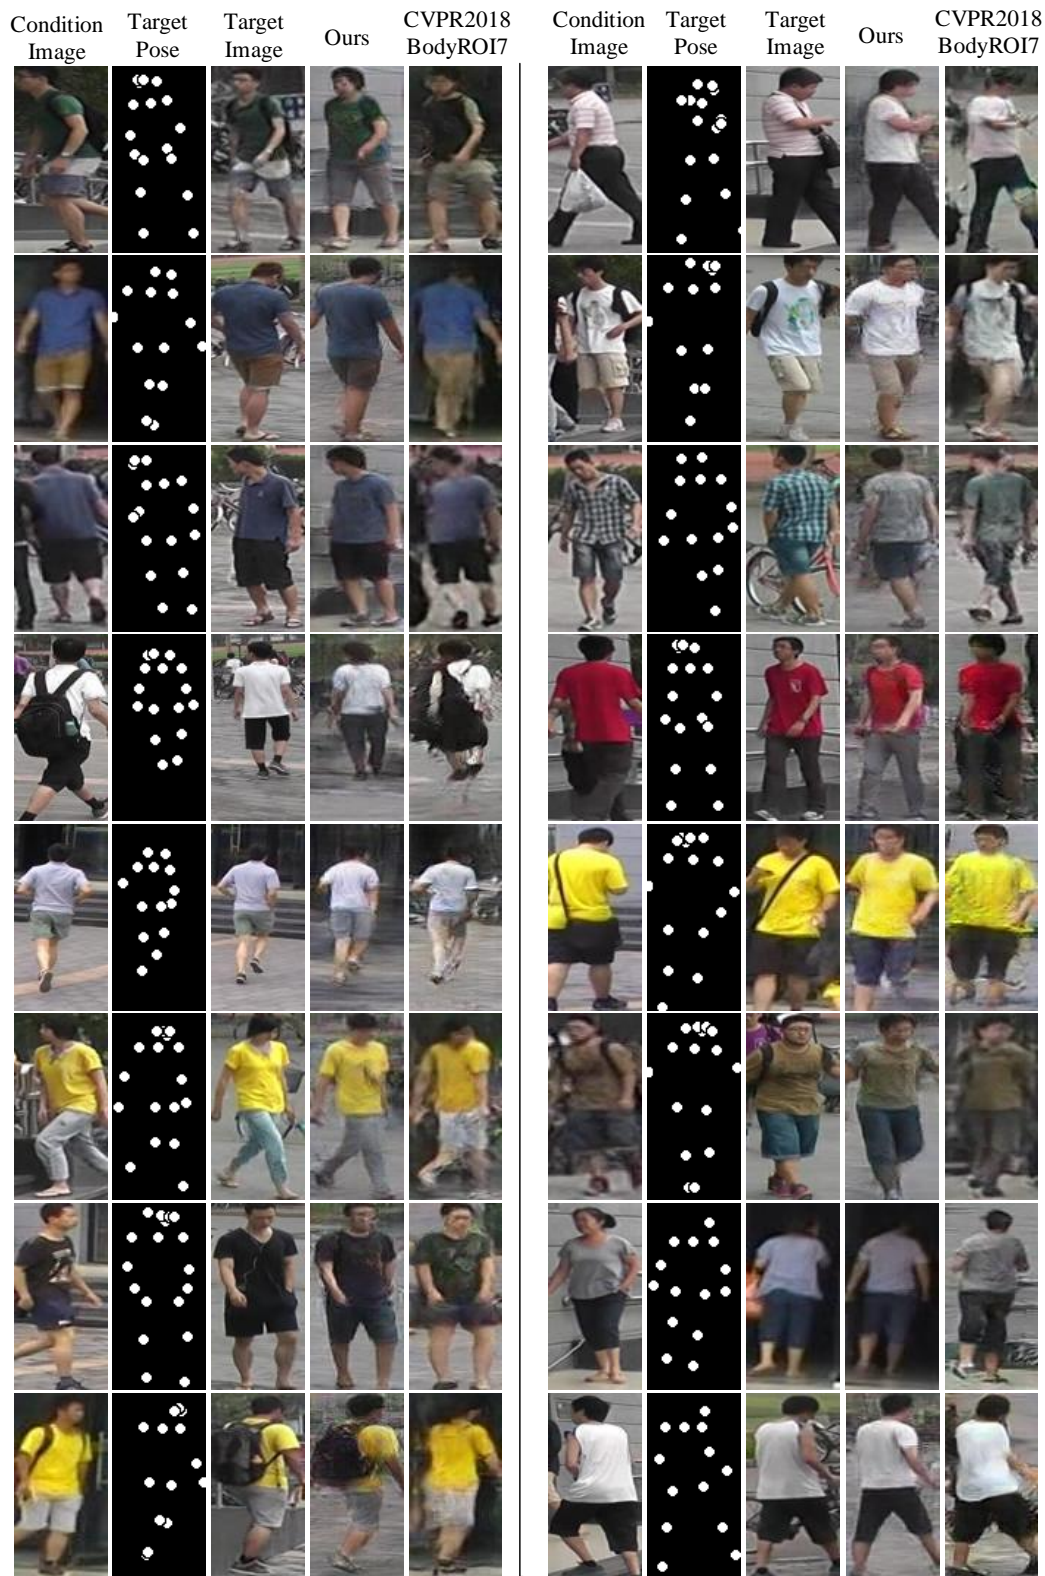

Figure 5: Compare against with BodyROI7 [2] (CVPR2018) on Market-1501 [4]. Zoom in for details.

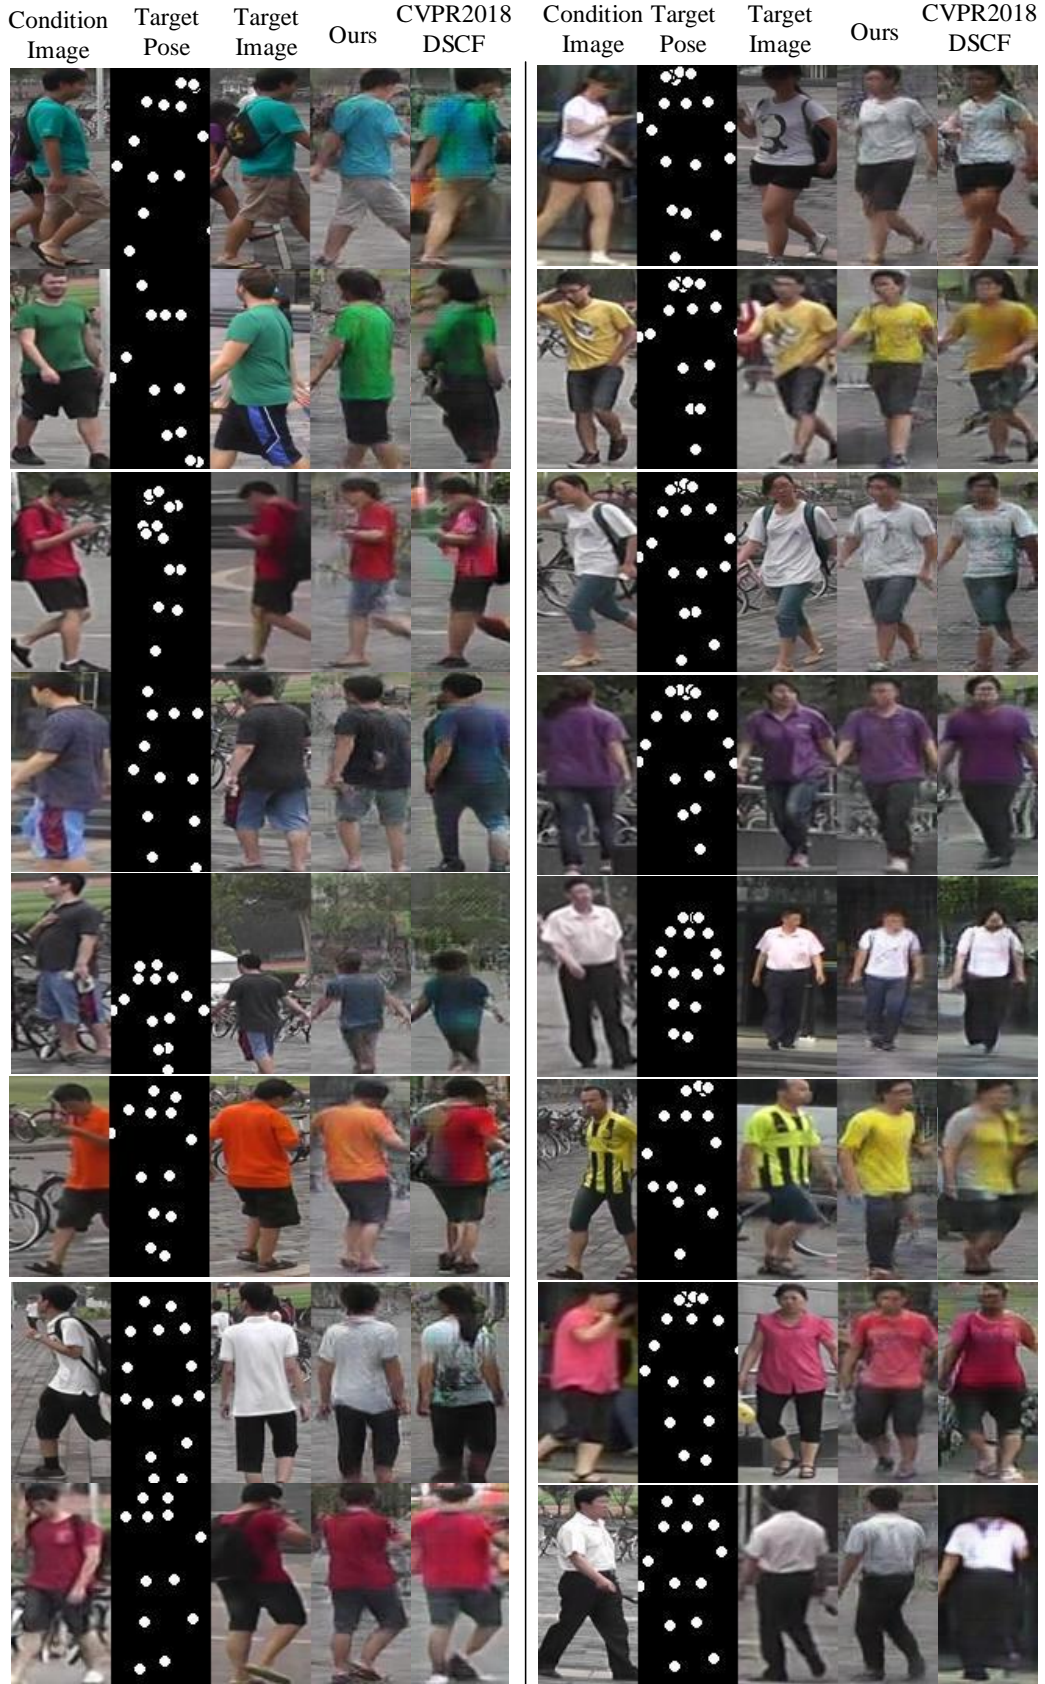

Figure 6: Compare against with DSCF [3] (CVPR2018) on Market-1501 [4]. Zoom in for details.



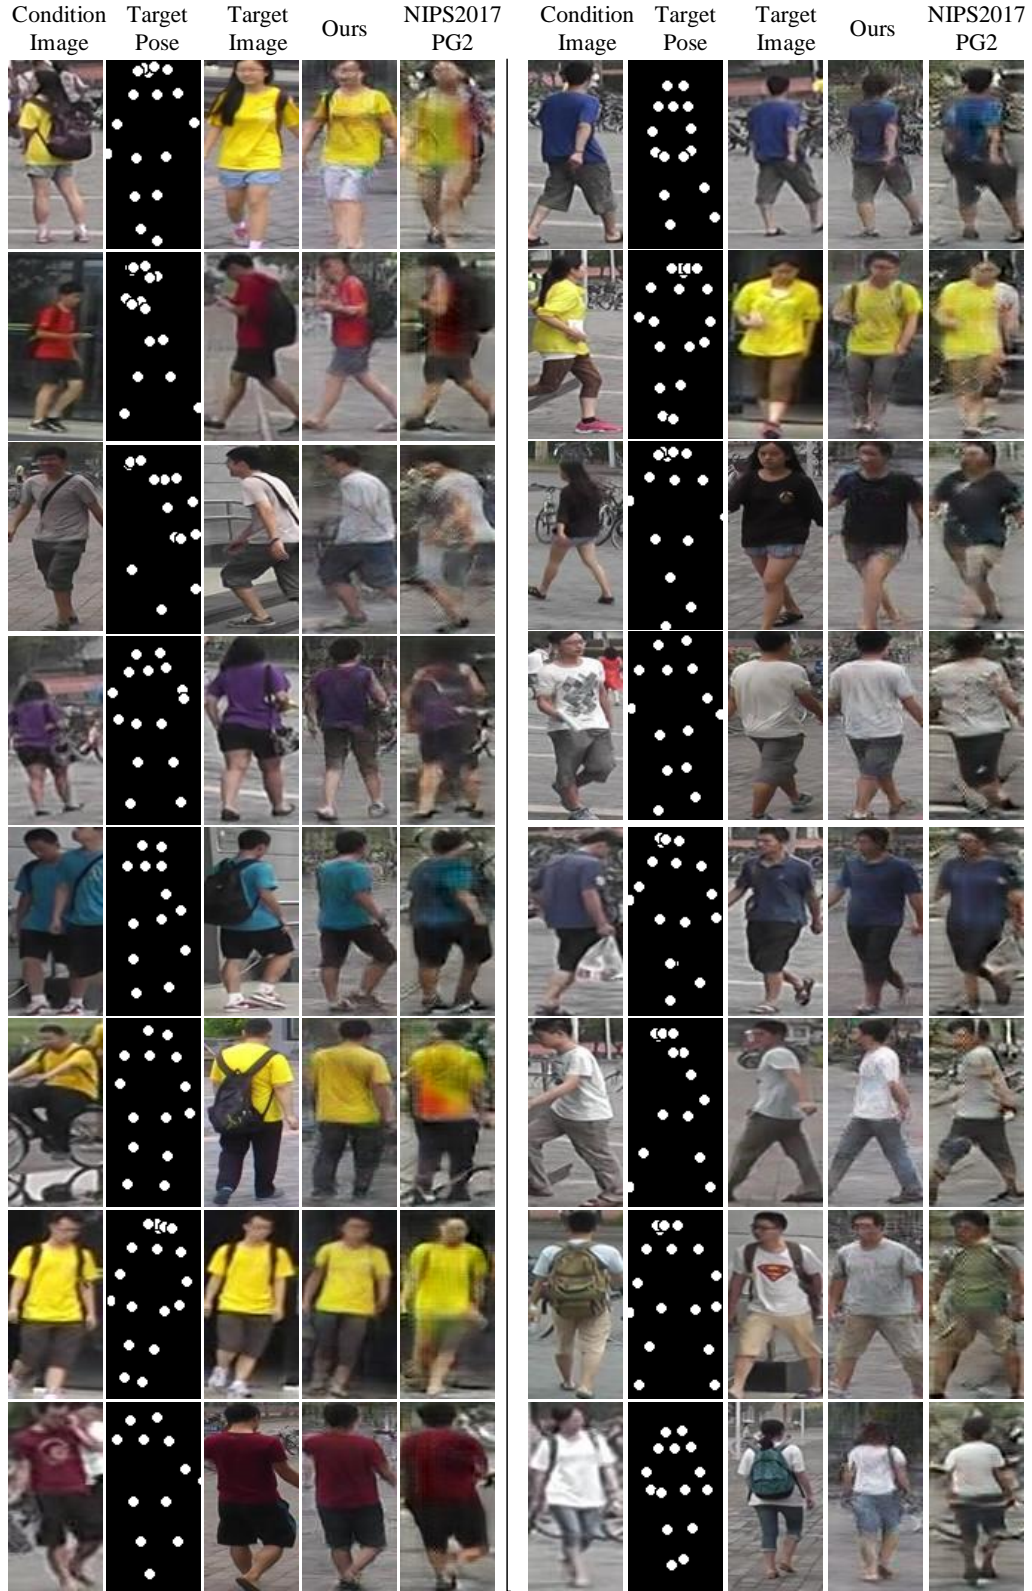

Figure 7: Compare against with PG2 [1] (NIPS2017) on Market-1501 [4]. Zoom in for details.

## References

- [1] Liqian Ma, Xu Jia, Qianru Sun, Bernt Schiele, Tinne Tuytelaars, and Luc Van Gool. Pose guided person image generation. In *NIPS*, 2017.
- [2] Liqian Ma, Qianru Sun, Stamatios Georgoulis, Luc Van Gool, Bernt Schiele, and Mario Fritz. Disentangled person image generation. In *CVPR*, 2018.
- [3] Aliaksandr Siarohin, Enver Sangineto, Stephane Lathuiliere, and Nicu Sebe. Deformable gans for pose-based human image generation. In *CVPR*, 2018.
- [4] Liang Zheng, Liyue Shen, Lu Tian, Shengjin Wang, Jingdong Wang, and Qi Tian. Scalable person re-identification: A benchmark. In *ICCV*, pages 1116–1124, 2015.
- [5] Shi Qiu Xiaogang Wang Ziwei Liu, Ping Luo and Xiaoou Tang. Deepfashion: Powering robust clothes recognition and retrieval with rich annotations. In *CVPR*, pages 1096–1104, 2016.
